# Supplementary material for: A proteomics–metabolomics approach indicates changes in hypothalamic glutamate–GABA metabolism of adult female rats submitted to intrauterine growth restriction
Source: Springer Nature journal article supplement (doi:10.1007/s00394-018-1851-6), 2018-11-07
Supplement: MOESM1 [file 16256792]

**A proteomics-metabolomics approach indicates changes in hypothalamic glutamate-GABA metabolism of adult female rats submitted to intrauterine growth restriction**

Amanda P. Pedroso<sup>1</sup>, Ana P. S. Dornellas<sup>1</sup>, Adriana P. de Souza<sup>1</sup>, Josias F. Pagotto<sup>2</sup>, Lila M. Oyama<sup>1</sup>, Cláudia M. O. Nascimento<sup>1</sup>, Jelena Klawitter<sup>3</sup>, Uwe Christians<sup>3</sup>, Alexandre K. Tashima<sup>2</sup>, Eliane B. Ribeiro<sup>1\*</sup>

<sup>1</sup>Universidade Federal de São Paulo, Escola Paulista de Medicina, Departamento de Fisiologia, São Paulo, SP, Brazil.

<sup>2</sup>Universidade Federal de São Paulo, Escola Paulista de Medicina, Departamento de Bioquímica, São Paulo, SP, Brazil.

<sup>3</sup>iC42 Clinical Research and Development, Department of Anesthesiology, University of Colorado Denver, Anschutz Medical Campus, Aurora, CO, USA.

**\*Corresponding author**

Eliane Beraldi Ribeiro

Universidade Federal de São Paulo, Departamento de Fisiologia.

Rua Botucatu 862

Vila Clementino, 04023-062, São Paulo, SP, Brazil.

E-mail: eliane.beraldi@gmail.com

Phone/Fax: 55 11 5576-4765

**Supplementary Table S1:** Mass spectrometry information of the proteins significantly affected by intrauterine growth restriction in the adult female rat hypothalamus

| UniProt ID | Protein Score |          |          | False Positive Rate (%) |      |      | Matched Peptides |      |     | Sequence Coverage (%) |       |       |
|------------|---------------|----------|----------|-------------------------|------|------|------------------|------|-----|-----------------------|-------|-------|
|            | Min           | Mean     | Max      | Min                     | Mean | Max  | Min              | Mean | Max | Min                   | Mean  | Max   |
| Q05683     | 301.61        | 1018.05  | 2328.58  | 0.00                    | 0.03 | 0.27 | 7                | 12   | 20  | 12.48                 | 29.33 | 55.73 |
| P30009     | 280.14        | 542.68   | 1338.87  | 0.00                    | 0.11 | 0.58 | 4                | 7    | 10  | 14.24                 | 29.69 | 40.78 |
| Q9Z269     | 199.53        | 996.07   | 2346.66  | 0.00                    | 0.05 | 0.71 | 3                | 7    | 10  | 14.40                 | 40.68 | 67.49 |
| Q6Q0N1     | 179.80        | 613.15   | 1435.27  | 0.00                    | 0.23 | 1.84 | 7                | 12   | 18  | 13.26                 | 35.03 | 62.95 |
| O35567     | 160.75        | 360.23   | 983.07   | 0.00                    | 0.45 | 2.03 | 6                | 14   | 21  | 9.12                  | 27.68 | 38.18 |
| P85969     | 1735.76       | 4977.41  | 10540.24 | 0.00                    | 0.00 | 0.00 | 6                | 14   | 20  | 32.32                 | 54.90 | 75.42 |
| P09606     | 720.89        | 2598.49  | 4983.32  | 0.00                    | 0.00 | 0.00 | 8                | 11   | 16  | 18.50                 | 38.56 | 59.52 |
| P10860     | 2782.06       | 5556.65  | 13023.67 | 0.00                    | 0.00 | 0.00 | 28               | 32   | 38  | 51.61                 | 62.34 | 72.22 |
| P70580     | 1131.48       | 2304.16  | 5065.62  | 0.00                    | 0.00 | 0.00 | 6                | 10   | 15  | 43.08                 | 58.27 | 67.69 |
| Q62952     | 580.53        | 1500.86  | 4659.94  | 0.00                    | 0.00 | 0.00 | 11               | 17   | 25  | 33.51                 | 42.19 | 56.34 |
| O08875     | 165.54        | 379.41   | 893.73   | 0.00                    | 0.50 | 1.37 | 4                | 5    | 9   | 9.70                  | 17.41 | 32.10 |
| P05696     | 114.35        | 232.64   | 331.15   | 0.23                    | 1.35 | 3.64 | 6                | 12   | 15  | 4.46                  | 15.90 | 28.42 |
| P16446     | 149.83        | 292.78   | 602.51   | 0.14                    | 0.72 | 2.30 | 8                | 11   | 15  | 24.72                 | 36.62 | 46.13 |
| P18666     | 358.15        | 547.04   | 778.20   | 0.00                    | 0.10 | 0.35 | 5                | 8    | 11  | 32.56                 | 41.98 | 54.65 |
| P41562     | 230.71        | 338.03   | 444.22   | 0.00                    | 0.35 | 0.75 | 7                | 11   | 15  | 17.39                 | 26.73 | 35.99 |
| P60522     | 435.32        | 649.85   | 803.79   | 0.00                    | 0.00 | 0.00 | 2                | 4    | 5   | 17.09                 | 25.93 | 36.75 |
| P62198     | 384.49        | 505.40   | 756.37   | 0.00                    | 0.03 | 0.13 | 9                | 11   | 16  | 25.37                 | 28.42 | 31.53 |
| P62870     | 331.91        | 613.70   | 892.64   | 0.00                    | 0.09 | 0.43 | 4                | 5    | 7   | 26.27                 | 53.05 | 83.90 |
| Q4V8E4     | 181.15        | 265.24   | 350.68   | 0.00                    | 0.68 | 1.53 | 4                | 7    | 9   | 8.16                  | 21.11 | 48.98 |
| Q62915     | 143.65        | 237.46   | 380.85   | 0.12                    | 1.06 | 2.05 | 10               | 17   | 20  | 11.11                 | 14.28 | 23.32 |
| Q66HR2     | 255.05        | 444.29   | 777.50   | 0.00                    | 0.26 | 0.46 | 5                | 6    | 7   | 20.52                 | 29.03 | 38.06 |
| Q75Q39     | 112.65        | 251.65   | 423.75   | 0.00                    | 1.18 | 3.48 | 9                | 14   | 22  | 8.69                  | 15.01 | 19.02 |
| Q9R0I8     | 137.98        | 219.71   | 259.81   | 0.12                    | 1.21 | 2.19 | 6                | 7    | 8   | 9.36                  | 16.31 | 28.33 |
| P19234     | 6669.66       | 10226.03 | 17460.82 | 0.00                    | 0.00 | 0.00 | 5                | 8    | 10  | 29.44                 | 41.97 | 57.66 |
| P27682     | 571.82        | 1497.89  | 4009.49  | 0.00                    | 0.00 | 0.00 | 2                | 5    | 8   | 18.57                 | 46.94 | 62.38 |
| O08775     | 165.55        | 226.99   | 326.44   | 0.95                    | 1.82 | 3.19 | 14               | 20   | 29  | 7.15                  | 9.26  | 13.18 |
| P02688-2   | 26914.30      | 33091.01 | 36623.99 | 0.00                    | 0.00 | 0.00 | 8                | 10   | 12  | 43.20                 | 54.84 | 60.95 |
| P51146     | 1313.86       | 3585.33  | 5456.31  | 0.00                    | 0.00 | 0.00 | 3                | 5    | 7   | 19.25                 | 30.42 | 36.62 |
